# Supplementary material
Source: PubMed Central journal article supplement (PMC2727075)
Supplement: NIHMS124175-supplement-b106Song_ox_sup_pdf.pdf [file NIHMS124175-supplement-b106Song_ox_sup_pdf.pdf]

**Supplementary Information**

**Calculated proton uptake on anaerobic reduction of cytochrome c oxidase: Is the reaction electroneutral?**

*Yifan Song, Ekaterina Michonova-Alexova and M.R. Gunner\**

Physics Department J-419

City College of New York

138th St. and Convent Ave.

New York, NY 10031

Table S1. Comparison of interactions between Heme  $a_3$  and  $Cu_B$  in different aquo protonation and cofactor redox states calculated in vacuum by Coulomb's law and DFT using Gaussian98. The Delphi Poisson-Boltzmann (PB) interactions are calculated in *Rb. sphaeroides* cytochrome c oxidase with  $\epsilon=80$  surrounding the protein embedded in a low-dielectric slab with cavities filled with  $\epsilon=80$ . The interactions used in MCCE in the  $pK_a$  and  $E_m$  calculations are given by  $(\Delta G_{PB} * \Delta G_{DFT} / \Delta G_{Coulomb})$ . See Materials and Methods for more complete description.

|                                                                 | Coulomb's law $\epsilon=1$<br>( $\Delta pK_a$ unit) | DFT<br>( $\Delta pK_a$ unit) | PB<br>( $\Delta pK_a$ unit) | used in<br>MCCE<br>( $\Delta pK_a$ unit) |
|-----------------------------------------------------------------|-----------------------------------------------------|------------------------------|-----------------------------|------------------------------------------|
| water-Heme $a_3$<br>- water- $Cu_B(II)$                         | 80.4                                                | 42.1                         | 15.7                        | 8.2                                      |
| hydroxyl-Heme $a_3$<br>- water- $Cu_B(II)$                      | -48.1                                               | -37.9                        | -9.8                        | -7.7                                     |
| water-Heme $a_3$<br>- hydroxyl- $Cu_B(II)$                      | 14.5                                                | -8.4                         | 3.2                         | -1.8                                     |
| hydroxyl-Heme $a_3$<br>- hydroxyl- $Cu_B(II)$                   | -12.4                                               | -7.4                         | -3.5                        | -2.1                                     |
| water-Heme $a_3$<br>- water- $Cu_B(I)$                          | 35.6                                                | 17.0                         | 5.1                         | 2.4                                      |
| hydroxyl-Heme $a_3$<br>- water- $Cu_B(I)$                       | -10.7                                               | -6.7                         | -2.5                        | -1.5                                     |
| water-Heme $a_3$<br>- hydroxyl- $Cu_B(I)$                       | -36.3                                               | -23.9                        | -7.3                        | -4.8                                     |
| hydroxyl-Heme $a_3$<br>- hydroxyl- $Cu_B(I)$                    | 18.7                                                | 21.4                         | 3.2                         | 3.6                                      |
| water-Heme $a_3$<br>- water- $Cu_B(II)$ -His <sup>-</sup>       | 42.9                                                | 12.2                         | 9.1                         | 2.6                                      |
| hydroxyl-Heme $a_3$<br>- water- $Cu_B(II)$ -His <sup>-</sup>    | -41.8                                               | -28.5                        | -8.0                        | -5.4                                     |
| water-Heme $a_3$<br>- hydroxyl- $Cu_B(II)$ -His <sup>-</sup>    | -23.1                                               | -22.6                        | -3.4                        | -3.3                                     |
| hydroxyl-Heme $a_3$<br>- hydroxyl- $Cu_B(II)$ -His <sup>-</sup> | -5.8                                                | 6.2                          | -2.0                        | 2.1                                      |
